# Supplementary material for: Light and acid dual-responsive organogel formation based on m-methyl red derivative
Source: Royal Society of Chemistry journal article supplement (doi:10.1039/c3ob41449c), 2013-01-01
Supplement: c3ob41449c.pdf [file c3ob41449c.pdf]

## Supporting Information

### Light and Acid Dual-responsive Organogel Formation Based on M-methyl Red Derivative

Xinhua Cao\*, Aiping Gao, Haiting Lv, Minghui Zhang, Xiuxiu Wang and Yang Fan\*

#### Scheme:

Compound **2** has been synthesized according to the reported method.<sup>[1]</sup>

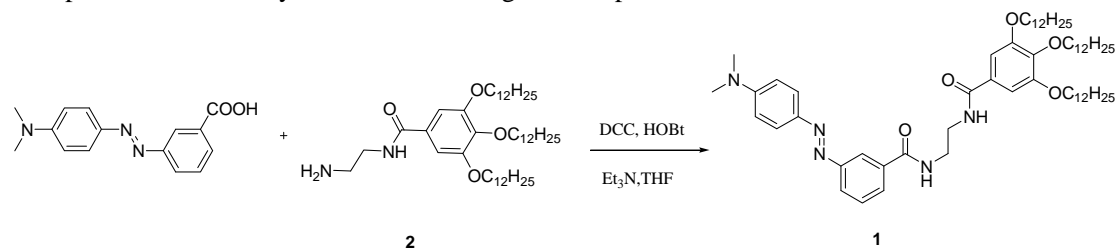

Scheme S1. Synthesis route of molecule **1**.

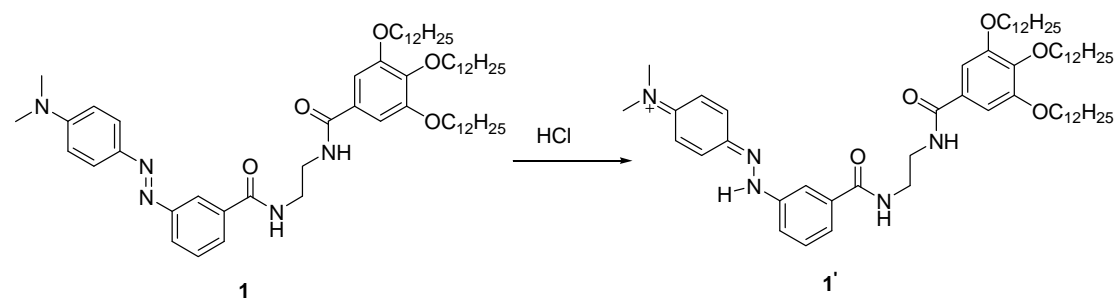

Scheme S2. Chemical structure of molecule **1** and **1'**.

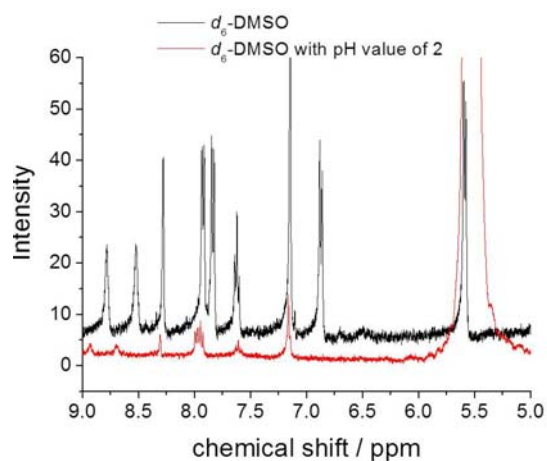

Figure S1. <sup>1</sup>H NMR spectra of compound **1** in d<sub>6</sub>-DMSO with the different pH value.

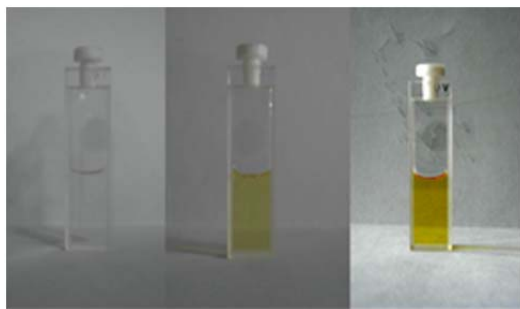

**Figure S2.** Images of solution of **1** at different condition: a) the solution of **1** in DMSO under the irradiation of 254 nm for one hour; b) the solution of **1** in DMSO; c) the solution of **1** formation in DMSO with the pH value of 2 ( $c_1 = 25 \text{ mg mL}^{-1}$ ).

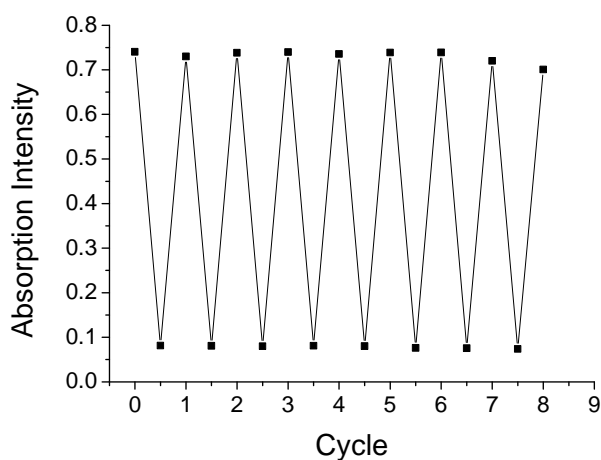

**Figure S3.** The absorption intensity at 427 nm change cycle experiment by changing UV/visible light irradiation.

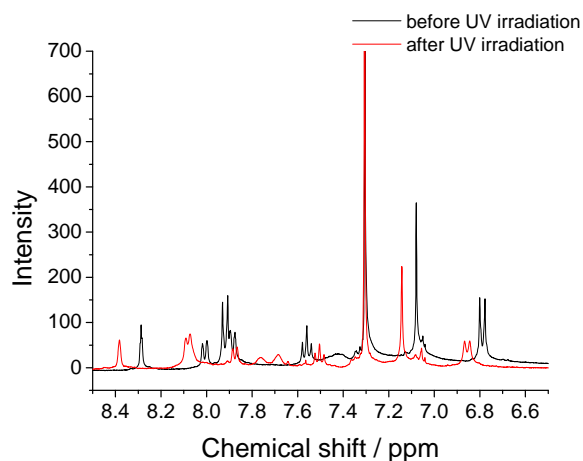

**Figure S4.**  $^1\text{H}$  NMR spectra of compound **1** in  $\text{CDCl}_3$  before and after irradiation by 254 nm light.

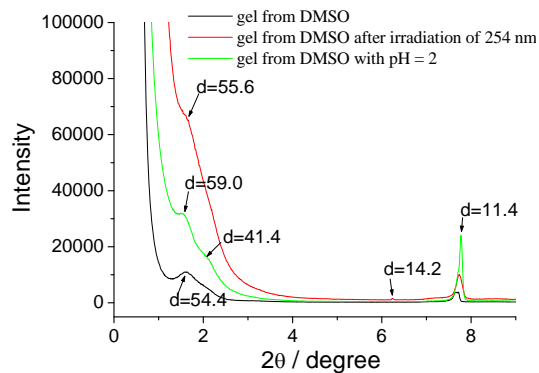

**Figure S5** Small angle XRD spectra of gel **1** obtained in DMSO ( $25 \text{ mg mL}^{-1}$ ) under different conditions at room temperature.

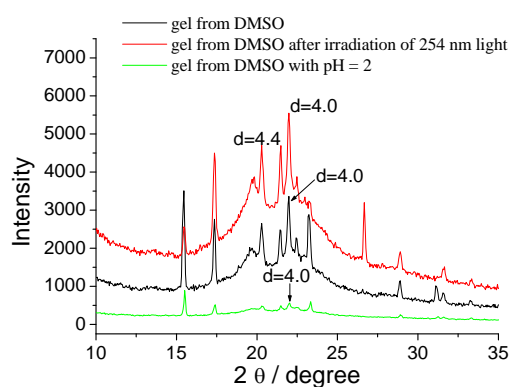

**Figure S6** Large angle XRD spectra of gel **1** obtained in DMSO ( $25 \text{ mg mL}^{-1}$ ) under different conditions at room temperature.

**References:**

- 1 X. Cao, J. Zhou, Y. Zou, M. Zhang, X. Yu, S. Zhang, T. Yi and C. Huang, *Langmuir*, 2011, **27**, 5090–5097.
